# Supplementary material for: Mathematical Identification of Critical Reactions in the Interlocked Feedback Model
Source: PubMed Central journal article supplement (PMC2040204; doi:10.1371/journal.pone.0001103), 2007-10-31
Supplement: pone.0001103.s003.pdf [file pone.0001103.s003.pdf]

**Table S2 Effect of the number of search parameters on selection of potentially influential parameters**

The table derives from **Figure S5**, where details in the simulation method are described. Application of a threshold value of  $10^{-8}$  to the amplitude sensitivities separates the potentially influential parameters (**Equation 10**), as marked in boldface. The kinetic parameters are sorted according to the minimum sensitivities in the descending order. The numbers of search parameters are 3 (A), 6 (B), 9 (C), 12 (D), 16 (E), 25 (F), and 36 (F), respectively. For a search parameter number of  $\geq 12$ , the members of the seventeen potentially influential parameters are the same.

| <b>A</b>    |             |             |             |             |             |             |             |              |             |              |             |             |             |             |             |             | <b>3</b>    |             |             |              |              |              |             |              |             |              |             |             |             |             |             |              |              |             |             |
|-------------|-------------|-------------|-------------|-------------|-------------|-------------|-------------|--------------|-------------|--------------|-------------|-------------|-------------|-------------|-------------|-------------|-------------|-------------|-------------|--------------|--------------|--------------|-------------|--------------|-------------|--------------|-------------|-------------|-------------|-------------|-------------|--------------|--------------|-------------|-------------|
| <b>R[1]</b> | <b>D[7]</b> | <b>A[2]</b> | <b>T[1]</b> | <b>K[2]</b> | <b>D[4]</b> | <b>R[3]</b> | <b>T[3]</b> | <b>D[10]</b> | <b>D[9]</b> | <b>D[11]</b> | <b>S[4]</b> | <b>S[3]</b> | <b>A[3]</b> | <b>D[1]</b> | <b>R[2]</b> | <b>V[2]</b> | <b>P[1]</b> | <b>D[8]</b> | <b>V[3]</b> | <b>D[3]</b>  | <b>D[6]</b>  | <b>S[5]</b>  | <b>S[6]</b> | <b>D[2]</b>  | <b>V[4]</b> | <b>A[1]</b>  | <b>V[1]</b> | <b>S[2]</b> | <b>S[1]</b> | <b>D[5]</b> | <b>K[1]</b> | <b>K[4]</b>  | <b>B[3]</b>  | <b>B[2]</b> | <b>B[1]</b> |
| <b>B</b>    |             |             |             |             |             |             |             |              |             |              |             |             |             |             |             |             | <b>6</b>    |             |             |              |              |              |             |              |             |              |             |             |             |             |             |              |              |             |             |
| <b>K[2]</b> | <b>D[7]</b> | <b>D[1]</b> | <b>T[1]</b> | <b>P[1]</b> | <b>D[2]</b> | <b>R[1]</b> | <b>D[3]</b> | <b>V[2]</b>  | <b>S[2]</b> | <b>S[1]</b>  | <b>S[3]</b> | <b>S[4]</b> | <b>R[2]</b> | <b>D[6]</b> | <b>D[4]</b> | <b>D[5]</b> | <b>K[1]</b> | <b>V[1]</b> | <b>R[3]</b> | <b>T[3]</b>  | <b>D[9]</b>  | <b>D[10]</b> | <b>A[2]</b> | <b>D[11]</b> | <b>A[3]</b> | <b>V[3]</b>  | <b>D[8]</b> | <b>S[5]</b> | <b>S[6]</b> | <b>K[4]</b> | <b>A[1]</b> | <b>V[4]</b>  | <b>B[1]</b>  | <b>B[2]</b> | <b>B[3]</b> |
| <b>C</b>    |             |             |             |             |             |             |             |              |             |              |             |             |             |             |             |             | <b>9</b>    |             |             |              |              |              |             |              |             |              |             |             |             |             |             |              |              |             |             |
| <b>D[7]</b> | <b>K[2]</b> | <b>S[4]</b> | <b>S[3]</b> | <b>R[1]</b> | <b>T[1]</b> | <b>D[3]</b> | <b>D[5]</b> | <b>P[1]</b>  | <b>R[2]</b> | <b>D[6]</b>  | <b>D[1]</b> | <b>D[2]</b> | <b>K[1]</b> | <b>S[1]</b> | <b>S[2]</b> | <b>D[4]</b> | <b>V[2]</b> | <b>V[1]</b> | <b>S[5]</b> | <b>S[6]</b>  | <b>A[1]</b>  | <b>A[2]</b>  | <b>A[3]</b> | <b>R[3]</b>  | <b>B[1]</b> | <b>B[2]</b>  | <b>B[3]</b> | <b>V[3]</b> | <b>V[4]</b> | <b>D[8]</b> | <b>D[9]</b> | <b>D[10]</b> | <b>D[11]</b> | <b>T[3]</b> | <b>K[4]</b> |
| <b>D</b>    |             |             |             |             |             |             |             |              |             |              |             |             |             |             |             |             | <b>12</b>   |             |             |              |              |              |             |              |             |              |             |             |             |             |             |              |              |             |             |
| <b>D[1]</b> | <b>T[1]</b> | <b>D[4]</b> | <b>D[3]</b> | <b>S[3]</b> | <b>S[4]</b> | <b>D[5]</b> | <b>P[1]</b> | <b>D[7]</b>  | <b>S[1]</b> | <b>S[2]</b>  | <b>V[1]</b> | <b>K[1]</b> | <b>D[6]</b> | <b>V[2]</b> | <b>D[2]</b> | <b>K[2]</b> | <b>R[3]</b> | <b>T[3]</b> | <b>D[9]</b> | <b>D[10]</b> | <b>A[2]</b>  | <b>A[1]</b>  | <b>D[8]</b> | <b>D[11]</b> | <b>S[6]</b> | <b>S[5]</b>  | <b>A[3]</b> | <b>R[1]</b> | <b>R[2]</b> | <b>B[1]</b> | <b>B[2]</b> | <b>B[3]</b>  | <b>V[3]</b>  | <b>V[4]</b> | <b>K[4]</b> |
| <b>E</b>    |             |             |             |             |             |             |             |              |             |              |             |             |             |             |             |             | <b>16</b>   |             |             |              |              |              |             |              |             |              |             |             |             |             |             |              |              |             |             |
| <b>S[1]</b> | <b>S[2]</b> | <b>D[1]</b> | <b>K[1]</b> | <b>D[4]</b> | <b>D[3]</b> | <b>P[1]</b> | <b>S[3]</b> | <b>S[4]</b>  | <b>D[2]</b> | <b>D[6]</b>  | <b>D[5]</b> | <b>T[1]</b> | <b>V[1]</b> | <b>D[7]</b> | <b>V[2]</b> | <b>K[2]</b> | <b>R[3]</b> | <b>K[4]</b> | <b>S[6]</b> | <b>A[3]</b>  | <b>D[11]</b> | <b>V[3]</b>  | <b>T[3]</b> | <b>A[1]</b>  | <b>D[9]</b> | <b>D[10]</b> | <b>S[5]</b> | <b>A[2]</b> | <b>R[1]</b> | <b>R[2]</b> | <b>B[1]</b> | <b>B[2]</b>  | <b>B[3]</b>  | <b>V[4]</b> | <b>D[8]</b> |
| <b>F</b>    |             |             |             |             |             |             |             |              |             |              |             |             |             |             |             |             | <b>25</b>   |             |             |              |              |              |             |              |             |              |             |             |             |             |             |              |              |             |             |
| <b>D[4]</b> | <b>T[1]</b> | <b>K[2]</b> | <b>P[1]</b> | <b>D[7]</b> | <b>S[3]</b> | <b>K[1]</b> | <b>D[1]</b> | <b>D[2]</b>  | <b>S[2]</b> | <b>V[1]</b>  | <b>D[3]</b> | <b>D[6]</b> | <b>V[2]</b> | <b>S[1]</b> | <b>D[5]</b> | <b>S[4]</b> | <b>S[5]</b> | <b>S[6]</b> | <b>A[1]</b> | <b>A[2]</b>  | <b>A[3]</b>  | <b>R[1]</b>  | <b>R[2]</b> | <b>R[3]</b>  | <b>B[1]</b> | <b>B[2]</b>  | <b>B[3]</b> | <b>V[3]</b> | <b>V[4]</b> | <b>D[8]</b> | <b>D[9]</b> | <b>D[10]</b> | <b>D[11]</b> | <b>T[3]</b> | <b>K[4]</b> |
| <b>G</b>    |             |             |             |             |             |             |             |              |             |              |             |             |             |             |             |             | <b>36</b>   |             |             |              |              |              |             |              |             |              |             |             |             |             |             |              |              |             |             |
| <b>D[1]</b> | <b>D[3]</b> | <b>K[1]</b> | <b>S[2]</b> | <b>P[1]</b> | <b>S[1]</b> | <b>D[4]</b> | <b>S[3]</b> | <b>S[4]</b>  | <b>D[5]</b> | <b>V[1]</b>  | <b>D[7]</b> | <b>T[1]</b> | <b>D[2]</b> | <b>K[2]</b> | <b>D[6]</b> | <b>V[2]</b> | <b>S[5]</b> | <b>S[6]</b> | <b>A[1]</b> | <b>A[2]</b>  | <b>A[3]</b>  | <b>R[1]</b>  | <b>R[2]</b> | <b>R[3]</b>  | <b>B[1]</b> | <b>B[2]</b>  | <b>B[3]</b> | <b>V[3]</b> | <b>V[4]</b> | <b>D[8]</b> | <b>D[9]</b> | <b>D[10]</b> | <b>D[11]</b> | <b>T[3]</b> | <b>K[4]</b> |
