# Supplementary material for: Mathematical Identification of Critical Reactions in the Interlocked Feedback Model
Source: PubMed Central journal article supplement (PMC2040204; doi:10.1371/journal.pone.0001103), 2007-10-31
Supplement: pone.0001103.s010.pdf [file pone.0001103.s010.pdf]

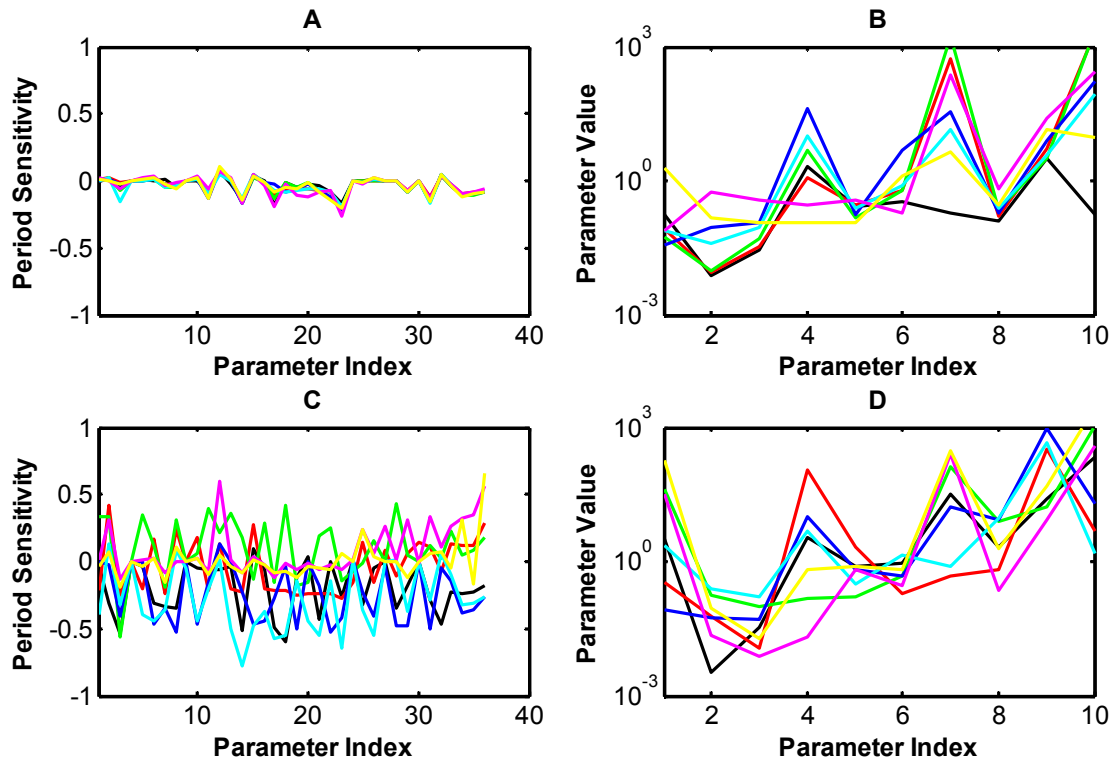

**Figure S7 Distributions of period sensitivities and their associated kinetic parameter values**

In the upper panels, the period sensitivity (A) and parameter value (B) distributions of the models showing seven smaller values of the CV period are plotted. A parameter index of one indicates  $S[1]$ , 2:  $A[1]=A[2]$ , 3:  $R[1]=R[2]$ , 4:  $V[1]$ , 5:  $V[2]$ , 6:  $D[1]$ , 7:  $P[1]$ , 8:  $T[1]$ , 9:  $K[2]$ , 10:  $K[1]$ .

In the lower panels, the amplitude sensitivity (C) and parameter value (D) distributions of the models showing seven larger values of the CV period are plotted.
